# Supplementary material
Source: publisher site journal article supplement (https://www.dovepress.com/article/268972)
Supplement: Supplementary file 1 [file get_supplementary_file.php]

**Supplementary Table 1** Overview of interview topic guide

| **Topics of interest** | **Example questions [explore/prompts]** |
| --- | --- |
| **Demographic Information** | - How long has your child been treated with Growth Hormone? |
| **Knowledge and understanding about Growth Hormone Deficiency**  *[Condition-related]* | - How well do you feel you understand your child’s Growth Hormone Deficiency?   ***prompt:*** *i.e. the condition? the cause? the timeline? etc.* |
| **Knowledge and understanding about growth hormone treatment**  *[Treatment-related]* | - Do you have any concerns or worries about your child’s prescribed treatment? If so, what are they? |
| **Device-related**  *[Treatment-related]* | - How do you feel about the device?   ***prompt:*** *in terms of satisfaction, convenience etc.* |
| **Experience and impact of Growth Hormone Deficiency and growth hormone treatment**  *[Treatment-related]* | - How would you describe your child’s overall growth response and development since starting on growth hormone treatment? Have you been satisfied with his/her progress so far? - What impact has the diagnosis with Growth Hormone Deficiency and the prescription of growth hormone treatment had on your life?   ***explore:*** *[daily life and life in general] Has it affected your work life, your relationships, family life, social life etc.?* |
| **Treatment Adherence** | - Since starting on the treatment, have you/your child ever forgotten to administer the growth hormone injection, altered the dose, chosen to miss a dose or stopped administering the treatment for a little while?   ***explore:*** *If yes, can you tell me more…?*   - Are there any difficulties or problems that you/your child experience(d) which prevent(ed) the daily dose of growth hormone*?*   ***explore:*** *If so, can you tell me more about these difficulties?* |
| **HCP-Parent relationship** | - How supported have you felt by your endocrine team, throughout your child’s treatment journey?   ***prompt:*** *in terms of information, support, communication.*  ***explore:*** *Can you tell me more…?* |

| **Themes** | **Definition** | **Illustrative Example** |
| --- | --- | --- |
| **Theme 1:** **Device Burdens**  **Subthemes:**   - Device issues - Administration technique - Discomfort and pain associated with daily injection | The impact of the physical device on the administration process, e.g., the difficulties to use the device and the pain caused by the device etc. | - “*So it’s really confusing and also with the pen that we use, you have to pull it back to pull the needle up and sometimes... and a couple of times we’ve found we’ve forgotten to do that and then you end up sticking them with the needle, or you go to press the button and then it hasn’t worked and you got to do it again, so there’s all of that and then you get really stressed”* P8 - Mother, 47 |
| **Theme 2: Treatment Considerations**  **Subthemes:**   - Administration Anxieties - Treatment Concerns | The evaluative concerns of the treatment, which effectively affects the administration process, e.g., concerns with expected and experienced side effects. | - *“It’s pretty scary, you know what I mean? You do, you do, worry that, you know, when they’re in their 30s, that something we did now turns into a problem, right? You know, we can’t hide from that.”* P14 - Mother, 51 |
| **Theme 3: Logistical Interferences**  **Subthemes:**   - Inconvenience of treatment regimen - Disruption to treatment regimen and scheduling issues - Forgetting to administer injection | Challenges with balancing the daily injection with family and social life due to interferences to the treatment routine, such as travelling or social engagements etc. | - *“We just find that, for slightly different reasons, when he’s on school trips or we’re not there, it is difficult and probably is the only time we take a slight view to miss it for a couple of nights.” P14 - Mother, 51* |
| **Theme 4: Interpersonal Influences**  **Subthemes:**   - Challenge to administer injection to child - Lack of HCP information input - Lack of knowledge and understanding - Poor HCP-parent/caregiver communication | The influence of others on the administration and management of growth hormone, i.e. lack of information or communication, or non-cooperation etc. | - *“It’s really difficult, because you know, we don’t really know, and the hospital doesn’t really know, and you are kind of feeling your way through it.”* P8 - Mother, 47 |

**Supplementary Table 2** Summary table of themes

**Supplementary Table 3** An overview of the main themes and codes outlining parent/caregivers’ perceptions, views and experiences, with selected illustrative quotes.

**Theme 1: Device Burdens**

| **Label of Subtheme** | **Label of Code** | **Definition of Code** | **Illustrative Example** |
| --- | --- | --- | --- |
| **Device issues** | Device difficulties | Difficulties to administer injection due to the device, i.e. technical difficulties with device features; reconstitution/preparation difficulties. | “I think it could be simpler…It looks a little complicated with sort of the dial on it and you know you have to sort of, put a new needle on every night, but there is no way around it, you obviously got to put a new needle on every night…It’s just a bit fiddly I find.” P10 - Mother, 47 |
| “I mean, the other thing that was difficult with our one we use and probably the drawback of it, is that it can be a bit awkward to hold, because you have to hold it, you have to hold it with one hand, so you have to get your finger ready and your thumb on top of the button to push because it is quite stiff, which is quite tricky to do and you have to have your hand round to click the button, so I mean, it’s quite tricky to push down, you really have to push hard, so it’s difficult.” P8 - Mother, 47 |
| “I don’t know if you’ve seen them, they’re like fat cartridge pens… And X has small hands and it’s actually quite tricky for a hand his size to do it without, you know, he could risk jerking the needle and stuff… The one that we use at the moment, you have to stick it in and put your hand on the top, like you’re putting a pen down and it’s hard for his little hand to actually do that.” P2 - Mother, 50 |
| “You sort of dial up the dose, it’s a bit of a pain…if you over-dial, it’s a bit of a fiddle faddle to then reverse that to sort of undial, that’s a bit of a faff…as I say it’s a bit of a pain to, if you over-dial to undo that.” P4 - Mother, 44 |
| “It’s quite chunky. For him to have his hand round and his finger at the top, because you have to push the trigger bit is actually quite clunky.” P2 - Mother, 50 |
| **Administration Technique** | Poor administration technique (skill) | Poor technique and physical skill when administering the injection. | “I think it’s because where I’m little, my hands, where my hands are smaller, I handle it a little bit different so I’m moving it around and I can hurt him a lot more. I might be pushing it too hard, because I’ve got to move it round, to then push it down.” P14 - Mother, 51 |
| “If you don’t put the needle in and you press by mistake, it sort of becomes a bit swollen at the top and then you can’t do it anymore, I mean there can be some issues…. It’s obviously quite complicated, it’s not that easy” P6 - Mother, 34 |
| “The needle went into his leg, it didn’t go in properly and it sort of, he didn’t get all of the dose into his leg.” P10 - Mother, 47 |
| “I have, I’m not perfect and there has been two occasions, where I’ve made a mistake and it was horrendous… there’s been two times where I’ve been a bit half distracted, set the pen up and everything, sat him down, we’ve done it, he’s pushed the needle in and I haven’t set the medicine. So, we’ve taken the needle, but the medicine wasn’t set” P1 - Mother, 44 |
| “I think I probably only had two or three tiny incidences of mistake, where the, I might have pricked him awkwardly with the needle or it went in, for whatever reason, I jogged it, or I was tired, or something happened.” P14 - Mother, 51 |
| “You’ve got to get used to using the pen…so it’s really confusing and also with the pen that we use, you have to pull it back to pull the needle up and sometimes and a couple of times. We’ve found we’ve forgotten to do that and then you end up sticking them with the needle, or you go to press the button and then it hasn’t worked and you got to do it again, so there’s all of that and then you get really stressed” P8 - Mother, 47 |
| **Discomfort and pain associated with daily injection** | Discomfort and pain associated with daily injection [child] | The discomfort and pain of the injection, experienced by the child, i.e. stinging; bleeding; or soreness from the injection or bruising at the injection site. | “It’s horrible and they are screaming, saying ‘nooo, no, don’t, it hurts, don’t do it’ and it’s horrible and they’re crying… it’s just awful.” P8 - Mother, 47 |
| “He went through a phase of not really wanting to have it done, I think as he kind of lost some fat and there were occasional times where it was slightly painful, he said ‘he didn’t want it done” P13 - Mother, 36 |
| “She’s so thin, she’s got no fat at all and so most of the time we hurt her, it does hurt and that’s a fact and it hits a nerve or something and she jumps.” P7 - Mother, 47 |
| “I remember it was getting awful for X because X is very slight.” P14 - Mother, 51 |
| “I mean it does hurt, it’s not nice, he is sticking a needle in his leg… every now and again he gets a little bruise, you know, it’s not nice for him.” P6 - Mother, 34 |
| “I mean, she still sometimes, it still happens sometimes, if I, you know, got the wrong place, I don’t know, sometimes the pain…so then after that, then she’s a bit conscious.” P3 - Mother, 48 |
| “Because we’ve all got fat in our bodies, it’s not that painful, but of course for X, because he hasn’t, he hasn’t got an ounce of fat on him, so it is more painful for him to have the injections.” P8 - Mother, 47 |
| “It did hurt him, because as I say, he is just skin and bone so that needle going in, it still does hurt him and particularly then when he was even smaller.” P8 - Mother, 47 |
| “There are other times where he does it when it really hurts him, so it’s just, you know, swings and roundabouts.” P8 - Mother, 47 |
| “He still finds it quite painful, the injection… yesterday was a bit painful for him” P1 - Mother, 44 |
| “Sometimes it bleeds as well” P1 - Mother, 44 |
| “Occasionally you get a nerve, kind of, in the skin area and it might hurt a little bit.” P13 - Mother, 36 |

**Theme 2: Treatment Considerations**

| **Label of Subtheme** | **Label of Code** | **Definition of Code** | **Illustrative Example** |
| --- | --- | --- | --- |
| **Administration Anxieties** | Worryof administering the daily injection (e.g. administration skill) | Worry, apprehension, nervousness, about administering the daily injection, due to, i.e. having to administer injection daily, using needles, administering correctly etc. | “I’m sort of nervous about injections myself anyways.” P9 - Mother, 45 |
| “I’m anxious about injections.” P9 - Mother, 45 |
| “I am a bit squeamish with needles.” P10 - Mother, 47 |
| “I’m a needle phobic myself, so the thought of having to do it every day, I thought ‘oh my goodness, this is going to be awful” P1 - Mother, 44 |
| “My main concern is to give an injection every day.” P9 - Mother, 45 |
| “When it comes to, actually giving the injection, I’m worried that I have to give it every day and it has to be repeated.” P9 - Mother, 45 |
| “Sometimes, it is worrying of course that I have to give injections.” P9 - Mother, 45 |
| “I don’t… I don’t want to give the injections myself.” P9 - Mother, 45 |
| “You know, you don’t want to have to give your child an injection every day, you know and you think ‘oh no, an injection.” P8 - Mother, 47 |
| “Trying to sort of push yourself to do something you know is going to be a nightmare. I was dreading it from lunchtime, you know, it was a bit like that” P1 - Mother, 44 |
| “I think there’s a level of, you would rather not do it.” P12 - Mother, 51 |
| “Well, obviously the first time you do it, or the first few times, you’re nervous about doing it and doing it right.” P14 - Mother, 51 |
| “It is a bit of a pain to think it’s still there at the back of my mind ‘I’ve got to do that today’.” P1 - Mother, 44 |
| Guilt of administering the injection (i.e. causing pain to child) | Guilt, sadness, anguish about administering the injection, i.e. causing pain to child | “It does make me feel awful sometimes…other times I just wish it wasn’t there to be honest.” P9 - Mother, 45 |
| “We’ll have to do it every evening and I kind of felt so sorry for my child… I felt sorry for her like, you know.” P3 - Mother, 48 |
| “They just feel like you’re trying to hurt them, you know… because you are the people that they trust the most in the world and you are doing that to them, even afterwards they kind of look at you like ‘why did you do that?’ I feel terrible.” P8 - Mother, 47 |
| “I don’t like doing it, especially when he says that sometimes it does hurts and I just feel horrible….” P1 - Mother, 44 |
| “You know… you don’t want to hurt them.” P14 - Mother, 51 |
| “It’s horrible and they are screaming, saying ‘nooo, no, don’t, it hurts, don’t do it’ and it’s horrible and they’re crying, you’re crying… it’s just awful.” P8 - Mother, 47 |
| “The child feels horrible and then you feel horrible because you are both kind of chasing around and then you’re getting impatient with him because they are crying and kicking you and trying to get away from you.” P8 - Mother, 47 |
| “X was literally up on her shoulders, he was literally climbing up her to get away from me with the needle, he was on her shoulders. And it was horrible.” P8 - Mother, 47 |
| **Treatment Concerns** | Concern with treatment side effects | Concerns with perceived treatment side effects (current/anticipated), i.e. headaches, growing pains, escalated early puberty. | “Well, the only concern we have is that... does it bring on early puberty. That was my only concern…at her age of 9, she has started developing buds, you know around her breasts, you know, that kind of thing…then they start their menstrual cycle and that kind of thing.” P11 - Mother, 58 |
| “What I would consider, the fears of the side effects or how that’s going to impact on her long-term and that’s still there.” P7 - Mother, 47 |
| “I was afraid and conscious about the side effects.” P3 - Mother, 48 |
| “My worry has always been you see, because they did say that in the first few days of taking it, you can get this headache, as one of the side effects.” P2 - Mother, 50 |
| “She does have more of, she has more of a spot issue, which they’re saying is not a side thing of it, but there’s a little bit of me going ‘I’m not so sure’ and also high body odour…. and I do think that is probably driven by the growth hormones even though lots of people are saying ‘no it’s not’, it just, it just seems very unusual, do you know what I mean….it may well be, it’s just triggering all that early.” P12 - Mother, 51 |
| “As he’s growing, he’s had kind of growing pains and things… I know friends of his do have growth… growing pains as well, so it’s not completely unheard of, but then the doubts kind of creep in that ‘oh, he is on the growth hormone’ and things.” P13 - Mother, 36 |
| “I would say because of the growth hormone her bones have grown so quickly, her muscles, her muscles haven’t managed to keep up with the bone growth, they’ve stretched, so she can’t seem to use them properly because her hamstrings are so tight it literally hurts when she walks…” P7 - Mother, 47 |
| “She has grown so quickly and so much and she’s so thin that I have often looked at her and thought ‘oh, she’s just too thin’, you know, she is just too thin for a child and because her bones have grown so quickly…but I would say because of the growth hormone, her bones have grown so quickly. In my head, I was like, ‘she’s growing too quickly, this isn’t good, you know, this is wrong, it’s unnatural, there were all those concerns.” P7 - Mother, 47 |
| “It just feels more extreme, because she’s grown 2 to 3 times as much as a child would grow in one year, so there is bound to be some kind of side effects, even if it’s not written down as a side effect of the growth hormone.” P7 - Mother, 47 |
| “There was a period of time when she was really struggling walking, she’s growing so quickly that her muscles aren’t working properly. And for me, it was perfectly clear that it was the growth hormone.” P7 - Mother, 47 |
| “I had some concerns because when I started, like you know, I thought that X had like mood swings.” P3 - Mother, 48 |
| “There’s some things, I guess…some things that we’d look at and kind of go ‘oh, I wonder if’… I don’t know. They all get stroppy days, don’t they and…they’re stroppy and you think ‘is that because they are a threenager or is that because they are taking the growth hormone?” P13 - Mother, 36 |
| "One of the things I heard was a potential, getting sort of a tumor in the brain because of the treatment and I thought oh my goodness, you know, if they have a bad headache, was it a tumor, wasn’t it a tumor? This was ages ago now, I think it was if they suffer from severe headaches or something, it could be, something like a stroke or tumor… or something serious, you know and… that really panicked me”. P1 - Mother, 44 |
| Fear of long-term effect of treatment | Concerns about long-term (future) adverse effects due to the treatment. | “What I would consider, the fears of the side effects or how that’s going to impact on her long-term and that’s still there.” P7 - Mother, 47 |
| “I do think a little bit about...in 20 years’ time, is, you know, X going to be talking to one of his friends saying ‘my parents put me through this growth hormone therapy, I know I got bigger but, the side effect is now look at my, you know, look at my dependency or look at my arm, or…’ I just …that bit we can’t judge….it does cross my mind from time to time.” P14 - Mother, 51 |
| “It’s pretty scary, you know what I mean? You do, you do, worry that, you know, when they’re in their thirties, that something we did now turns into a problem, right? You know, we can’t hide from that.” P14 - Mother, 51 |
| “I was thinking, right I obviously want to research the medication to make sure it’s…there’s no sort of long-term effects or anything for him having it” P1 - Mother, 44 |
| “I don’t think we really understand the implications of the treatment going forward and what it means for them as an adult.” P14 - Mother, 51 |
| “So, longer term side effects, I would say we’re still unsure of.” P14 - Mother, 51 |
| Dissatisfaction with effectiveness of treatment | Dissatisfaction/disappointment with the effectiveness of the treatment, i.e. effect on growth and/or development. | “His feet, they said, ‘his feet will grow really quickly, that’s the first thing you’ll notice’, but again his feet haven’t really grown that much, when you consider how far behind he was. So, I’m shocked that it’s not been more.” P1 - Mother, 44 |
| “From the outset, when you look at pictures of other kids on these sorts of sites, on the Facebook page and the amount of growth, the difference, it’s sort of astounding in 6 months, it wasn’t like that with X, not at all.” P1 - Mother, 44 |
| “He has grown, not massively and I think, possibly a year ago, he possibly wasn’t meeting the markers… I don’t think he was meeting what should have been. I think we had really minute growth for about, the second 6 months of that year, but he had then shot up in these last 6 months, so it’s not kind of been stable, it has been a bit up and down. … I think it was between 6 years and 6 and a quarter, that, yeah that sort of age 6ish, see there wasn’t much growth then at all and that’s when we were thinking ‘oh he’s not making very much progress at all’, he grew half a centimeter, no a quarter of a centimeter for one of those, not very much.” P2 - Mother, 50 |

**Theme 3: Logistical Interferences**

| **Label of Subtheme** | **Label of Code** | **Definition of Code** | **Illustrative Example** |
| --- | --- | --- | --- |
| **Inconvenience of treatment regimen** | Interference of injection on daily life (e.g. timing of injection) | Interference/inconvenience of injection on daily and social life, i.e. timing. | “It’s an inconvenience.” P12 - Mother, 51 |
| “Equally it’s an inconvenience, you know.” P2 - Mother, 50 |
| “You have to give it close to bedtime as possible and so there’s a real issue around that…, because bedtimes are such an issue anyways, especially at that age, at 4 and so there was a problem around, especially when we first gave it, that he knew that come bedtime, that he’s getting the injection and so it made, not only was he stressed about the injection, it kind of made the whole connotation of going to bed really complex…. I didn’t want bedtimes to become this stressful time…. And I think that’s quite hard… because you would have spent the last 4 years trying to get him into a bedtime routine, struggling with that and then would have probably just about got them into some type of routine where they are happy to go off to bed at a certain time and then throw that in the mix, is quite hard and one of the things I thought ‘oh this is going to make it really difficult with bedtimes.” P8 - Mother, 47 |
| “If there could be a worse time of the day really, just before bed…it was quite challenging because obviously at the end of the day, they’re sort of done and so having to then, the idea for all of us really, of sort of dealing with the battle and the tears of having to put a needle in and things.” P5 - Mother, 39 |
| “It’s just another complication and also if you’ve got other kids and younger kids, their time is particularly full-time, so you’re trying to get your other kids into bed, or stay in bed or whatever and your older kids are doing homework or whatever, so it’s a tricky time and then to deal with a distraught child at that time is quite hard, so it’s a shame really that it has to be so late. We were told that the later he has it before bed, the more effective it will be, so yeah, that was another issue.” P8 - Mother, 47 |
| **Disruption to treatment regimen and scheduling issues** | Being away from home [social events, travelling, school trips, overnight sleepovers] | Disruption of the daily treatment routine due to being away from home i.e. [social events, travelling, school trips, overnight sleepovers]. | “We travel somewhere and we come back late and the children have fallen asleep in the car, at 9 or 10pm and we transfer them from the care to bed basically, we carry them to bed. Very often in that situation, we choose not to give her her injection because she’s half asleep and it would be traumatic.” P7 - Mother, 47 |
| “I think occasionally has been, when we might have gone to friends and then not got back till 1 in the morning and he’s been asleep in the car.” P8 - Mother, 47 |
| “I would say the first dose that…he missed, would have been say last year when he went on camp for the first time, so that was 2 nights.” P5 - Mother, 39 |
| “The only time it might be an issue is if he’s away from home, if he’s on a school trip.” P14 - Mother, 51 |
| “The only times where we’ve not taken it is, when they’ve been away on a cub camp or a school trip.” P14 - Mother, 51 |
| “But we just find that, for slightly different reasons, when he’s on school trips or we’re not there, it is difficult and probably is the only time we take a slight view to miss it for a couple of nights.” P14 - Mother, 51 |
| “She had, she doesn’t have very often, a couple of sleepovers and of course, you are not going to administer for a sleepover, no, you’re not going to do that. So, she’ll miss a night, you know, she’ll miss one night for a sleepover.” P11 - Mother, 58 |
| “When she goes on school trips, which is, you know, twice a year, well as of this past year, she won’t have an injection for that week.” P11 - Mother, 58 |
| Illness [child] | Disruption of the daily treatment routine due to child’s illness, i.e. headache, stomach-ache, high temperature etc. | “Well to be honest, there are occasions, we’ll occasionally skip the dose if X is not feeling very well and if she is having an off day or she is feeling unwell and off school, sometimes I will to be honest, I’ll skip the dose.” P9 - Mother, 45 |
| “Of course, if she is unwell, if she is having a day if she has headache or stomach-ache and a day off school, she feels…she feels she needs a day off the injection as well.” P9 - Mother, 45 |
| “If she will have a high temperature like, you know, then we don’t have to do it because it’s not going to work, let’s say.” P3 - Mother, 48 |
| “I think the only time we’ve chosen not to do it is if he’s been really ill. If he’s like had a sickness bug or he’s throwing up all day and he looks awful, we’ve just said ‘you know what, we won’t do the injection tonight’, you know, if he’s been feeling really rough…but yeah, if he’s very ill or he’s lying in bed and really ill, we’ve said ‘actually, you know, we’re just not going to do that.” P8 - Mother, 47 |
| “The only conscious decision not to do it is if he is ill.” P8 - Mother, 47 |
| “Once I didn’t do it and he had a really nasty stomach bug and was violently throwing up… he couldn’t, he couldn’t even sit still, poor little thing and I just thought and he was asleep and yeah, so we missed it once, kind of vaguely out of choice… I remember he was asleep and I thought ‘there’s no way I’m going to wake him up.” P13 - Mother, 36 |
| **Forgetting to administer injection** | Active forgetting, e.g. due to travel or social activities | Forgetting to administer the injection, due to disruptions to routine, i.e. travel or social activities (active). | “Well, we were going on holiday and rushing out the door to get the train and then a lot of things got forgotten and that was one of them.” P9 - Mother, 45 |
| “We forget when we are out of our usual routine, so for example we travel somewhere and we come back late.” P7 - Mother, 47 |
| “We’re out of that routine and we don’t think about it.” P7 - Mother, 47 |
| “On holiday…we forget that first night and then half-way through the holiday, we forget again. It’s so… it’s such a habit thing, it’s such a routine thing that as soon as you break them, it’s easy to forget.” P7 - Mother, 47 |
| “Once we forgot when we were on the way back from somewhere and it was late, we had left at teatime, not bringing it with us and then got home at like 8 o clock and they were all asleep and we just popped them all in bed and forgot.” P13 - Mother, 36 |
| Passive forgetting, e.g. accidental | Forgetting to administer the injection accidentally (passive). | “We did forget once. There was once and it wasn’t that long ago and we were shocked that we forgot it. Exceptionally we might have forgotten.” P14 - Mother, 51 |
| “It’s just accidental that we forget.” P9 - Mother, 45 |
| “There’s been times where we’ve forgotten it.” P8 - Mother, 47 |
| “So, there’s been days where he’s missed it, there’s been days where I’ve thought X has done it and X thinks I’ve done it and neither of us have done it.” P8 - Mother, 47 |
| “So, forgetting, we definitely do every now and again.” P7 - Mother, 47 |
| “I mean, I have been known to take the medication but forget the needles.” P12 - Mother, 51 |
| “Well, I don’t usually forget, much.” P11 - Mother, 58 |
| So, it’s those sorts of things, it’s the real basics of just forgetting.” P12 - Mother, 51 |

**Theme 4: Interpersonal Influences**

| **Label of Subtheme** | **Label of Code** | **Definition of Code** | **Illustrative Example** |
| --- | --- | --- | --- |
| **Challenge to administer injection to child** | Challenge to administer injection to child (due to child reluctance, non-cooperation or refusal) | Difficulty to administer the injection, due to the child’s non-cooperation, reluctance, refusal or aversion towards the injection. | “It is our child and it’s hard for her, there is a lot of, occasionally…not co-operative and other problems.” P9 - Mother, 45 |
| “It’s hard…. it’s hard to do because they’re resistant, then yeah, it’s a battle, isn’t it” P1 - Mother, 44 |
| “We had a phase which she just simply refused it and really did not want it... we found it very tough, it was right at the beginning….the phase of refusal arrived and she just did not want to have it and there was screaming and shouting and running away. It’s really hard.” P7 - Mother, 47 |
| “I think he had one that was really painful and he was just like ‘no’… and we had several weeks where it was horrendous. I mean, I was crying, he was crying. It was terrible”. P1 - Mother, 44 |
| “It was like a battle.” P1 - Mother, 44 |
| “It did used to be quite a battle.” P5 - Mother, 39 |
| “He was upset and fighting me, that was a real low point, I’ll be honest with you.” P1 - Mother, 44 |
| “I mean, when we started, well when we started, it is horrendous when you start doing it … It’s horrible and they are screaming, saying ‘nooo, no, don’t, it hurts, don’t do it’ and it’s horrible and they’re crying, you’re crying, it’s just awful. And we went through, we did a couple of weeks through that.” P8 - Mother, 47 |
| “The child feels horrible and then you feel horrible because you are both kind of chasing around and then you’re getting impatient with him because they are crying and kicking you and trying to get away from you.” P8 - Mother, 47 |
| “X was literally up on her shoulders, he was literally climbing up her to get away from me with the needle, he was on her shoulders. And it was horrible.” P8 - Mother, 47 |
| “At the start, it was quite difficult to get him, for us to administer it to him, so on a bad day, I could have taken an hour to do his injection; you’re trying to cajole him into it, giving him a treat or promise.” P14 - Mother, 51 |
| “He still moans about it now…he still does still moan about it…he’s desperate for it to stop now.” P8 - Mother, 47 |
| “X still, pretty much hates it… You know, he still sort of mutters and doesn’t really, you know, he would rather not do it.” P5 - Mother, 39 |
| “Even now X is not happy about doing it.” P14 - Mother, 51 |
| “My daughter will moan about having her injection.” P12 - Mother, 51 |
| “It just became this nightmare. He was running round the house, trying to hide under the sofa. I was like ’nooo, if we don’t do it tonight, what will we do tomorrow night?’ Ah it was horrible.” P13 - Mother, 36 |
| “He went through a phase of not really wanting to have it done, I think as he kind of lost some fat and there were occasional times where it was slightly painful, he said ‘he didn’t want it done.” P13 - Mother, 36 |
| **Lack of HCP Information input** | Lack of information provided about the nature of condition [HCP] | Lack of information (Insufficient/ minimal/vague) provided by the HCP about the nature of the child’s medical condition. | “It’s really difficult, because you know, we don’t really know and the hospital doesn’t really know and you are kind of feeling your way through it.” P8 - Mother, 47 |
| “I do feel as though I researched it myself and found out, you know, more than I was sort of told at diagnosis stage… I just felt as though I needed more understanding.” P10 - Mother, 47 |
| “The doctors were vague, very vague” …. “with the consultant, when you’re trying to understand about what went wrong, there was vagueness, no clear answers.” P7 - Mother, 47 |
| “They’re of course quite vague about it and kind of say ‘well it could be this or it could be that and this’ and I think I did once, I think I got a bit frustrated.” P8 - Mother, 47 |
| “Yeah, they can’t really explain anything.” P7 - Mother, 47 |
| **Lack of knowledge and understanding of condition** | Lack of knowledge and understanding of the condition | The lack of knowledge and understanding of the child’s medical condition *(i.e. identity, timeline, cause, consequences, curability/controllability)* | “I have a general understanding of it, I don’t think I have an in-depth understanding” … “I wouldn’t say that I fully understand it.” P7 - Mother, 47 |
| “We haven’t got a clear understanding about it, but we hope to gain that.” P9 - Mother, 45 |
| “I have some limitations in my understanding.” P13 - Mother, 36 |
| “I don’t know a huge amount” P1 - Mother, 44 |
| “The bit I personally don’t really understand in particular is the point about the pituitary gland and the kind of relationship between that and growth… I just don’t, I just… I just don’t really understand. I mean, that is just a complete mystery to me” P15 - Father, 47 |
| “I don’t think we understand the causes particularly… I don’t think we really understand the cause.” P14 - Mother, 51 |
| “It’s really difficult, because you know, we don’t really know and the hospital doesn’t really know and you are kind of feeling your way through it.” P8 - Mother, 47 |
| **Poor HCP-parent/caregiver communication** | Poor listening and understanding of concerns [HCP] | Poor communication behavior of the HCP (verbal and non-verbal), i.e. not listening, lack of acknowledgement and understanding of concerns etc. | “I mean the consultants are always so firm in saying ‘nope, this is not a side effect of growth hormone’ and they seem really fixated about saying that, that they end up not really listening.” P7 - Mother, 47 |
| “You know how arrogant some consultants can be and that I found, yeah, that I found quite difficult, because at least it should be an open dialogue.” P7 - Mother, 47 |
| Reluctance to discuss worries with HCP [parent] | Parent/caregiver reluctance to approach HCP to discuss worries and concerns, due to poor consultation communication style of HCP i.e. feeling dismissed, blamed, trivialized or intimidated by HCP. | “It depends on which endocrinologist you see…. I tend to avoid asking him questions purely because I feel like he’s one of these types that sees each individual child as a clinical case, they don’t see the human side of it, they just see the clinical case……I’d like to have that little human factor and so I avoid talking to him.” P6 - Mother, 34 |
| “They always treat the patient as ‘you don’t need to know about this…so let’s move on’ you know.” P7 - Mother, 47 |
| “It’s very easy for especially the consultants just to assume that parents are just going to take it all on board and just crack on, you know and then they’re like ‘oh, he’s not taking it regularly, so therefore you know the fact that your child Is not growing is your fault’ sort of thing.” P6 - Mother, 34. |
| “They often have that attitude of parents being a burden.” P7 - Mother, 47 |
| “I know what it’s like to feel intimidated by your doctor….you’re not being, you don’t feel like you can ask a question and then you take away this treatment and you don’t feel like you can ring up to ask a question” P6 - Mother, 34 |
